# Supplementary material
Source: PubMed Central journal article supplement (PMC535425)

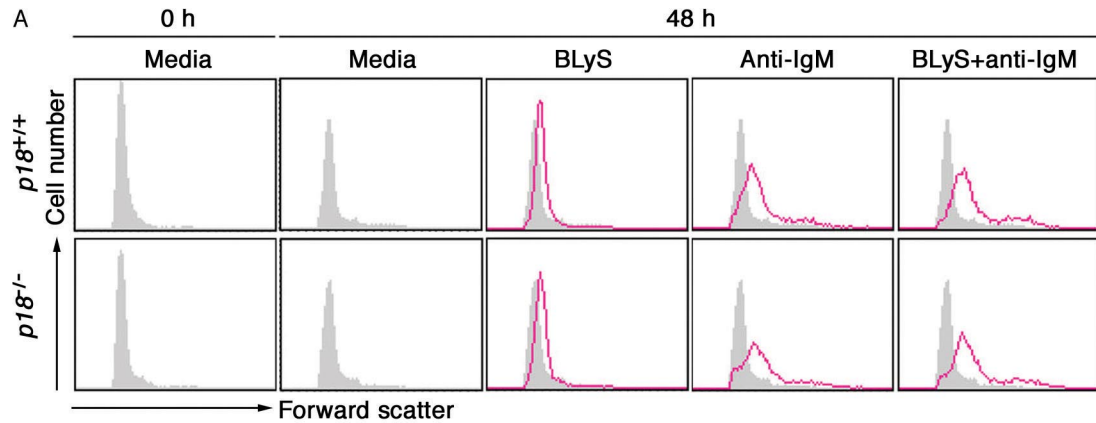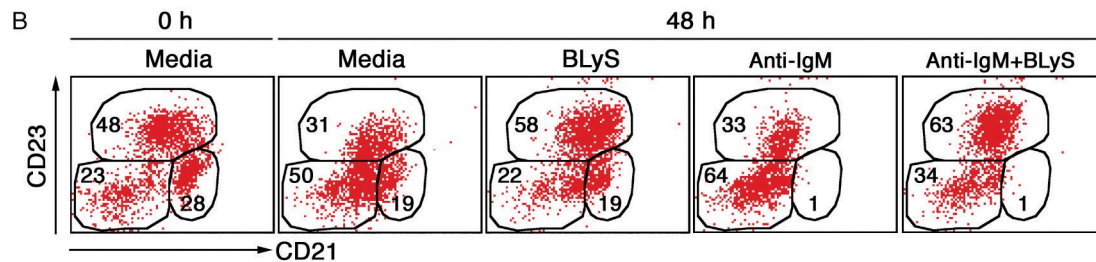

Supplement: pnas_101_51_17789__1.pdf [file pnas_101_51_17789__1.pdf]
